# Supplementary material for: Eco-friendly and sustainable approach of assembling sugars into biobased carbon fibers
Source: Royal Society of Chemistry journal article supplement (doi:10.1039/d2gc01075e), 2022-01-01
Supplement: d2gc01075e1.pdf [file d2gc01075e1.pdf]

### Supplementary information

#### Eco-friendly and sustainable approach of assembling sugar into biobased carbon fibers

Yu Yang<sup>1</sup>, Daming Chen<sup>1</sup>, Yuan Cheng<sup>1</sup>, Boqian Sun<sup>1</sup>, Guangdong Zhao<sup>2</sup>, Weidong Fei<sup>3</sup>,

Wenbo Han<sup>1\*</sup>, Jiecai Han<sup>1</sup> & Xinghong Zhang<sup>1\*</sup>

<sup>1</sup>Science and Technology on Advanced Composites in Special Environments Laboratory, Harbin Institute of Technology, Harbin 150006, China.

<sup>2</sup>School of Chemistry and Materials Science, Heilongjiang University, Harbin 150080, China.

<sup>3</sup>The National Key Laboratory for Precision Hot Forming of Metals, Harbin Institute of Technology, Harbin 150006, China.

\*Correspondence: [zhangxh@hit.edu.cn](mailto:zhangxh@hit.edu.cn) (X.Z.); [wghan@hit.edu.cn](mailto:wghan@hit.edu.cn) (W.H.);

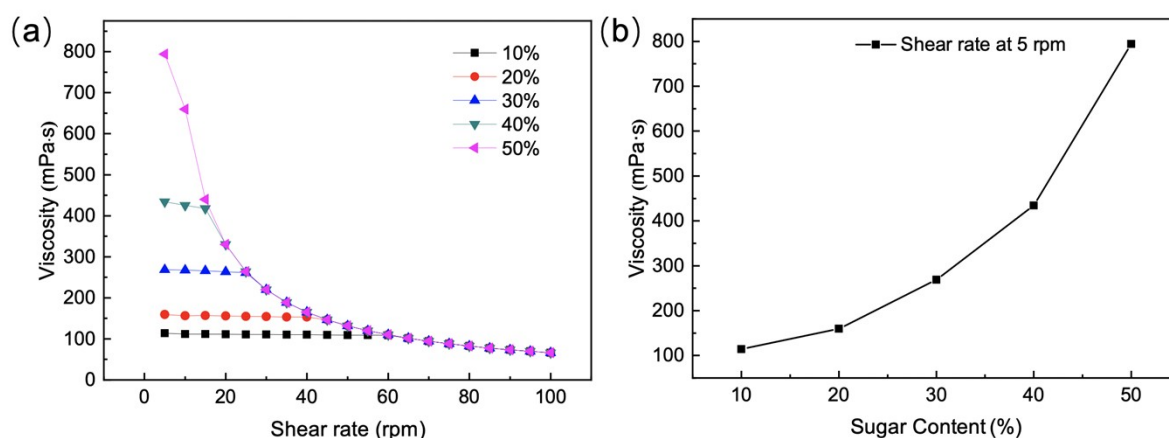

**Figure S1.** The rheological properties of the solution under fixed SA content. (a) viscosity change of the solutions at different shear rate. (b) viscosity of the solutions with different sugar content at shear rate of 5rpm.

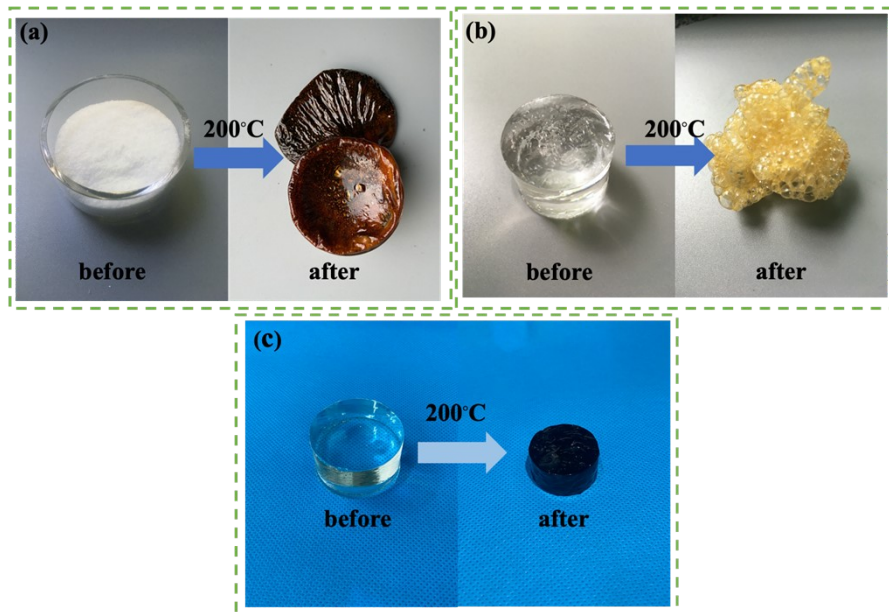

**Figure S2.** Uncontrollable deformation of the structure under 200°C (a) Glucose. (b) polyacrylamide hydrogel. (c) Glucose/polyacrylamide hydrogel.

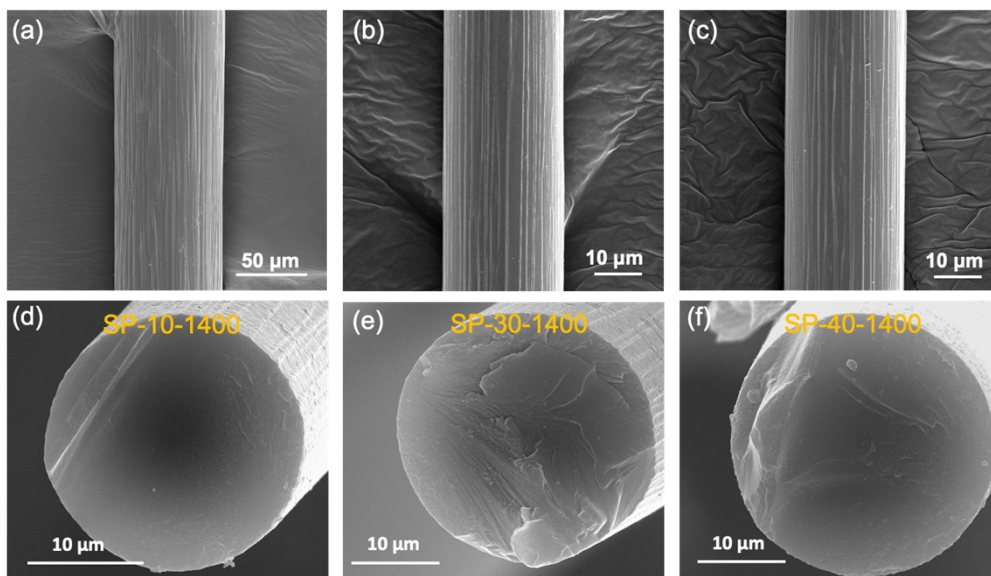

**Figure S3.** SEM image of SBCFs. (a)~(c) Surface morphology of the SBCFs with different diameter. (d)~(f) Cross section morphology of the SBCFs with different PAM concentration

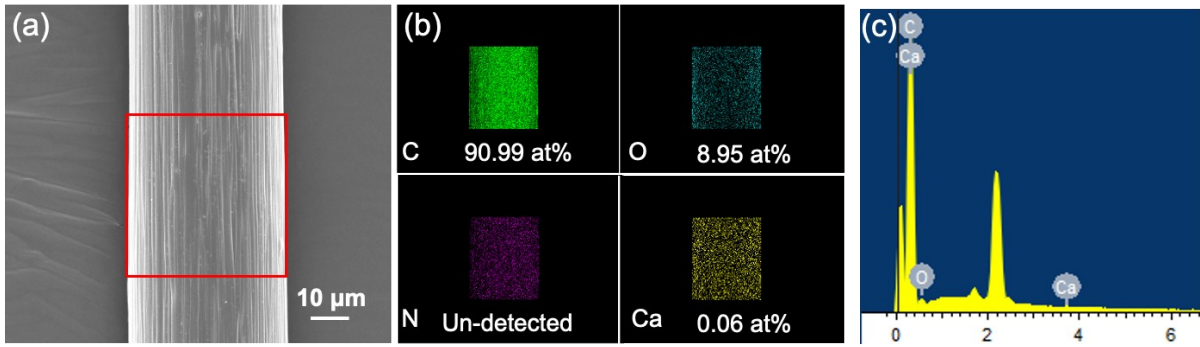

**Figure S4.** EDS analysis of SBCFs.

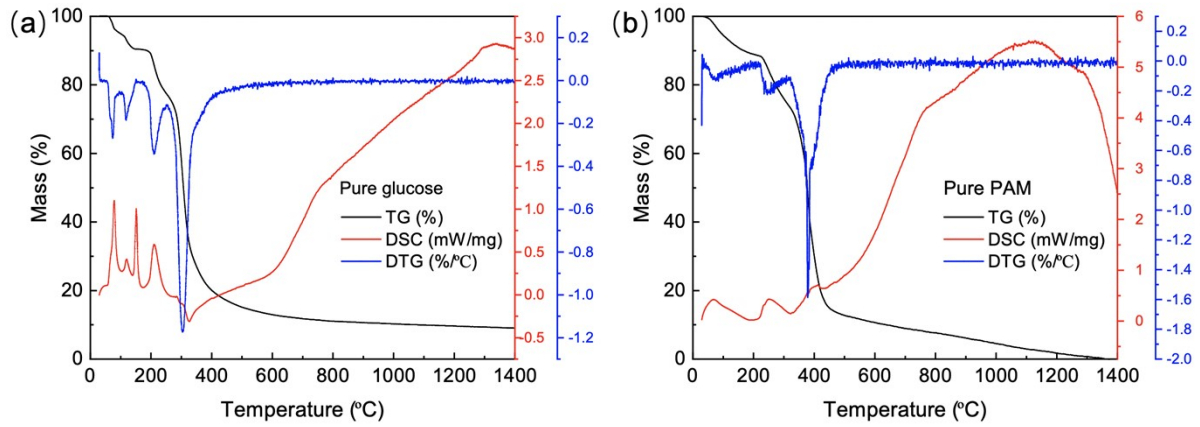

**Figure S5.** Thermogravimetric analysis of pure glucose and PAM. (a) glucose. (b) PAM.

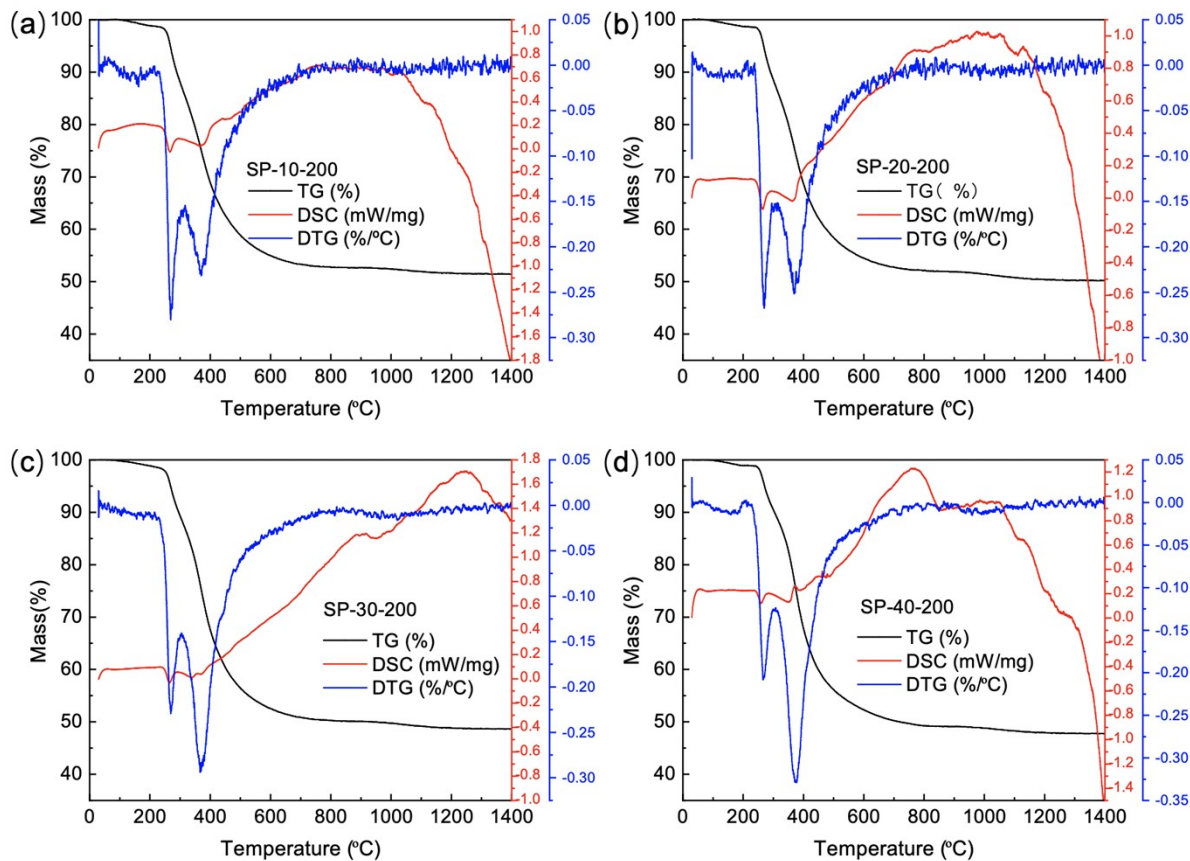

**Figure S6.** Thermogravimetric analysis of precarbonized fibers with different PAM content. (a)10%. (b)20%. (c)30%. (d)40%.

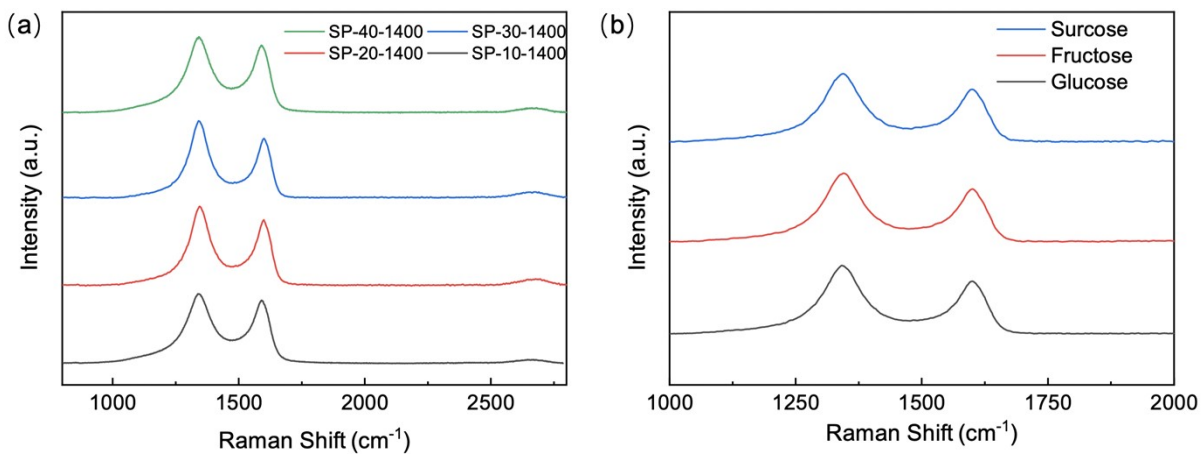

**Figure S7.** Raman pattern of SBCFs (a) Raman pattern of SBCFs with PAM content from 10% to 50%. (b) Raman pattern of SBCFs manufactured from different sugar.

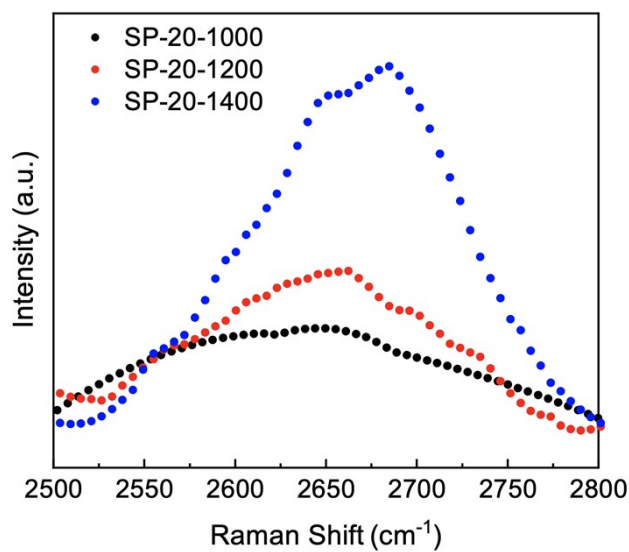

**Figure S8.** 2D peaks of SBCFs at various temperatures

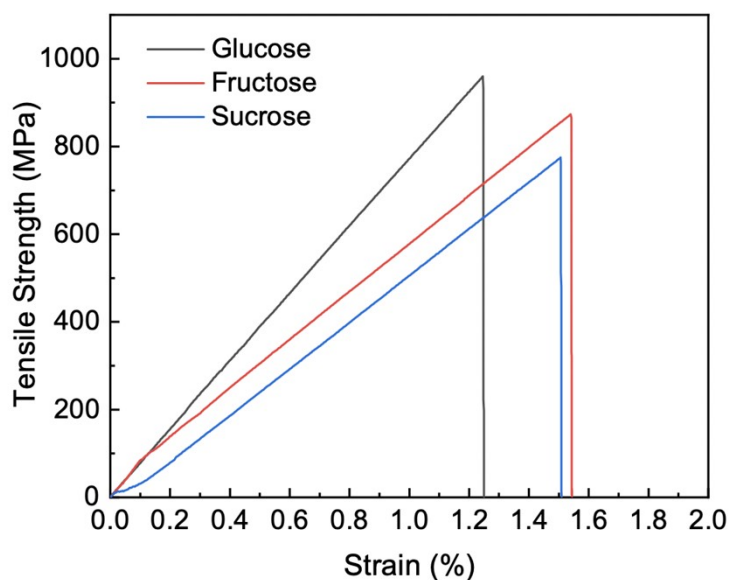

**Figure S9.** Tensile strength made from different sugar.

**Table S1.** Mechanical properties of SBCFs

| Sugar type | number     | diameter            | Highest Tensile strength (MPa) | Average Tensile strength (MPa) | Average Modulus (GPa) |
|------------|------------|---------------------|--------------------------------|--------------------------------|-----------------------|
| glucose    | SP-10-1400 | $26.1 \pm 4.5$<br>2 | 521                            | $424 \pm 74.1$                 | $43.0 \pm 4.1$        |
|            | SP-20-1400 | $27.3 \pm 5.4$<br>1 | 960                            | $775 \pm 115.0$                | $70.6 \pm 7.0$        |
|            | SP-30-1400 | $28.3 \pm 3.0$<br>3 | 893                            | $698 \pm 126.1$                | $64.6 \pm 9.6$        |
|            | SP-40-1400 | $30 \pm 4.17$       | 632                            | $534 \pm 71.2$                 | $41.0 \pm 9.2$        |

|          |            |                 |     |             |             |
|----------|------------|-----------------|-----|-------------|-------------|
|          | SP-50-1400 | 33 ± 5.94       | 448 | 367 ± 103.8 | 33.1 ± 9.0  |
|          | SP-20-1000 | 30.2 ± 4.9<br>2 | 624 | 517 ± 74    | 36.4 ± 3.7  |
|          | SP-20-1200 | 28.4 ± 5.0<br>1 | 653 | 547 ± 87    | 42.9 ± 9.7  |
| fructose | SP-20-1400 | 27.6 ± 3.3      | 873 | 754 ± 107.6 | 61.9 ± 14.2 |
| sucrose  | SP-20-1400 | 29.5 ± 3.1      | 775 | 714 ± 85.5  | 56.1 ± 4.3  |

**Note S1.**

**Calculation of graphitic crystal parameters:** X-ray resource was generated at 40 mA current and 40 kV voltage with Cu Ka wavelength ( $\lambda$ ) of 1.542 Å. The diffractograms of all samples were recorded in the  $2\theta$  range of 10 -90. Scanning step size was set at 0.05°, and the scanning rate was 5°/min.

The distance between two crystalline lattices ( $d_{hkl}$ ) was estimated using Bragg's law:

$$2d\sin\theta = n\lambda \quad (1)$$

Where  $d$  is the distance in nm;  $\theta$  is the Bragg angle in degree;  $n$  is set as 1;  $\lambda$  is the X-ray wavelength (1.542 Å)

The crystalline size ( $L_{hkl}$ ) was calculated using Scherrer equation:

$$L = \frac{K\lambda}{\beta\cos\theta} \quad (2)$$

Where  $L$  is the crystalline size, nm;  $K$  is shape factor, set as 1.84 and 0.89 for  $L_a$  and  $L_c$  in this calculation, respectively;  $\lambda$  is the X-ray wavelength (1.542 Å);  $\beta$  is the full width at half maximum (FWHM) in radian;  $\theta$  is the Bragg angle in degree.

**Note S2.**

**Calculation of order parameters of SAXS and WAXS:** SAXS and WAXS measurements were performed in a transmission geometry with an X-ray wavelength  $\lambda = 1.542$  Å and sample-to-detector distance fixed at 2316 mm for SAXS and 130 mm for WAXS.

The quantification of the SAXS and WAXS patterns was performed by first transforming the diffractogram into a rectangular image with the scattering vector,  $q$  (defined as  $q = 4\pi \sin(\theta)/\lambda$ , where  $\theta$  is the scattering angle), and the azimuthal angle  $\varphi$ , as coordinates. At each  $q$ -value the distribution was normalized with the highest intensity. The final orientation (intensity) distributions were then found by taking the mean between  $0.13 < q < 3.5 \text{ nm}^{-1}$  for SAXS. WAXS measurement were carried out for a scattering angle range of  $0.2\text{-}80^\circ$ . The orientation of crystallographic in the fibers was quantified by the (002) reflection on the WAXS patterns.

The alignment of the SBCFs was quantified by converting the orientation distribution into a Hermans order parameter,  $H$ , defined as:

$$H = \left\langle \frac{3}{2} \cos^2 \varphi - \frac{1}{2} \right\rangle \quad (3)$$

and the order parameter can be expanded as

$$H = \int_0^\pi I(\varphi) \left( \frac{3}{2} \cos^2 \varphi - \frac{1}{2} \right) \sin \varphi d\varphi \quad (4)$$

which is normalized according to:

$$\int_0^\pi I(\varphi) \sin \varphi d\varphi = 1 \quad (5)$$

Where  $I(\varphi)$  is the intensity distribution along a constant  $q$ -value.
